# Supplementary material
Source: HighWire-hosted journal article supplement (https://jnis.bmj.com/content/neurintsurg-2019-014997)
Supplement: inline-supplementary-material-1 [file inline-supplementary-material-1.docx]

**SUPPLEMENTAL MATERIAL**

**SUPPLEMENTAL TABLES**

**Supplementary Table I: Distribution of RACE Alert Population per 12-month interval during the study period.**

|  | **Any stroke or TIA** | **LVO on CTA** | **Mechanical Thrombectomy** |
| --- | --- | --- | --- |
| **July 2015 – June 2016 (n=168)** | 122 (73%) | 54 (32%) | 37 (22%) |
| **July 2016 – June 2017 (n=159)** | 113 (71%) | 70 (44%) | 50 (31%) |
| **July 2017 – June 2018 (n=165)** | 120 (73%) | 58 (35%) | 38 (23%) |
| **p-value*** | 0.984 | 0.562 | 0.824 |

*Cochran-Armitage test

LVO: large vessel occlusion; TIA: transient ischemic attack; CTA: computed tomography angiography

**SUPPLEMENTAL FIGURES**

**
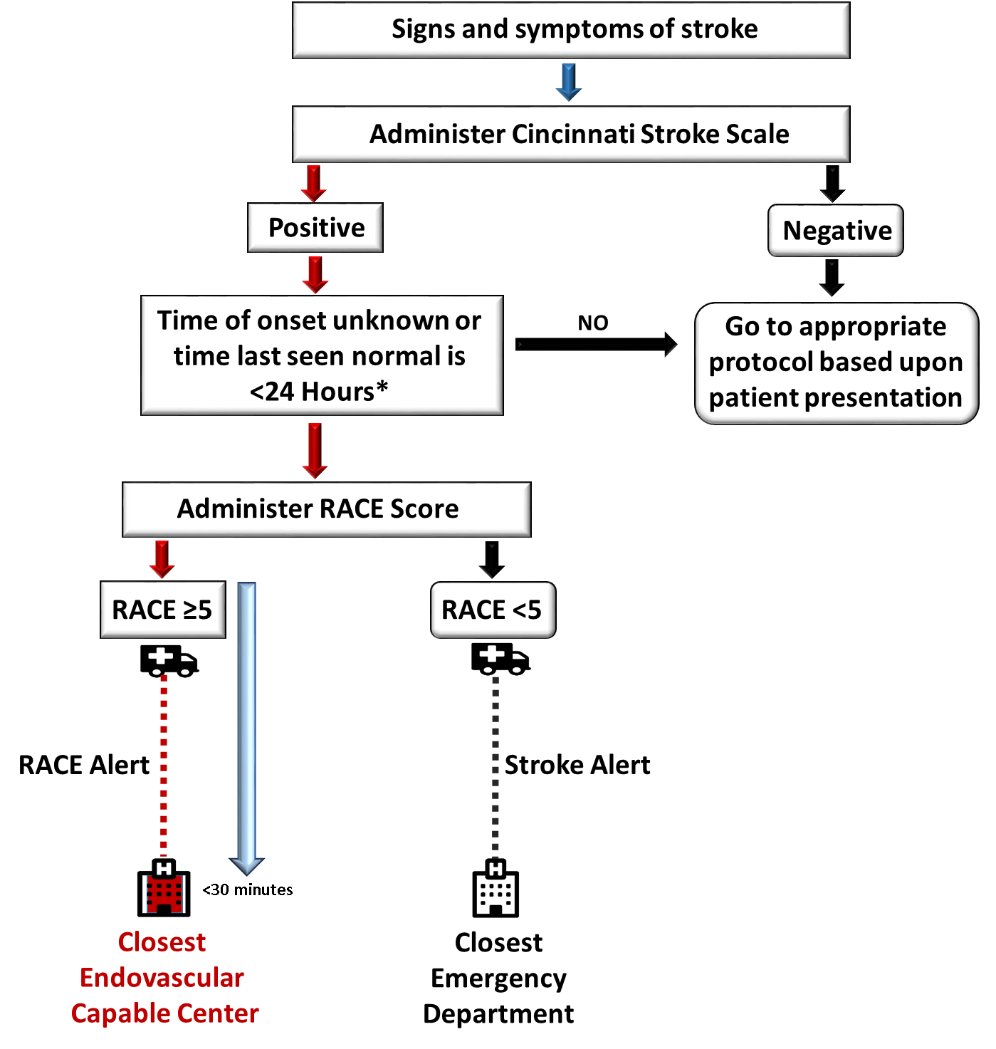
**

**Supplemental Figure I. RACE Alert Protocol.** *Protocol was modified in March 2018 from last seen normal <12hours to <24hours. RACE Scale administration to transport of patient to closest ECC should ideally be <30 minutes.

**Supplemental Figure II. TRACER Protocol.** ED: emergency department; CTA; computed tomography angiography

**
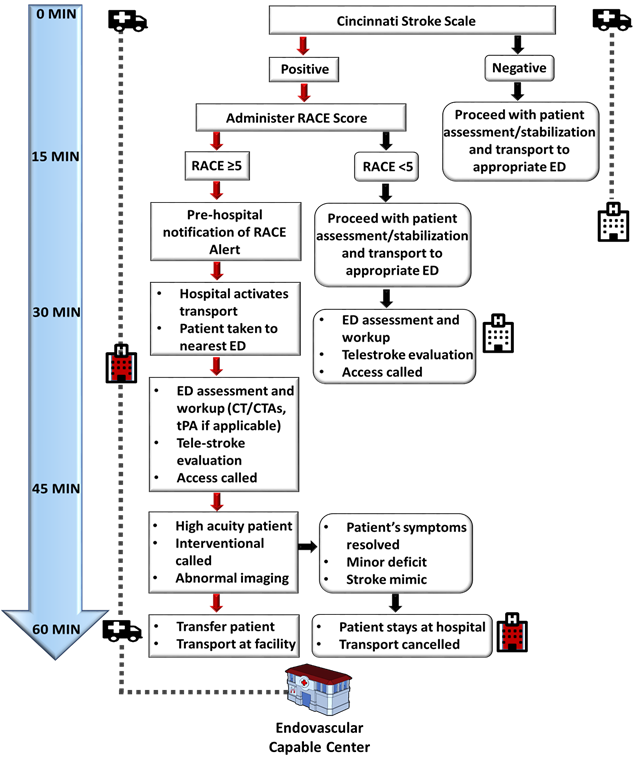
**

**SUPPLEMENTAL METHODS**

**5-Hospital Network Details**

Hospital Network PSCs

1st PSC:

Neuro ICU- No

Total Beds: 311

Accreditation: Joint Commission Primary Stroke Center

2nd PSC:

Neuro ICU- No

Total Beds: 72

Accreditation: Joint Commission Primary Stroke Center

3rd PSC:

Neuro ICU- No

Total Beds: 300

Accreditation: DNV GL Healthcare Primary Stroke Center

Hospital Network ECCs

1st ECC:

Neuro ICU- Yes

Total Beds: 794

Accreditation: Joint Commission Comprehensive Stroke Center

2nd ECC:

Neuro ICU- Yes

Total Beds: 267

Accreditation: Joint Commission Primary Stroke Center (with interventional capabilities)

**RACE Alert Endovascular Capable Center Emergency Department Protocol:**

**
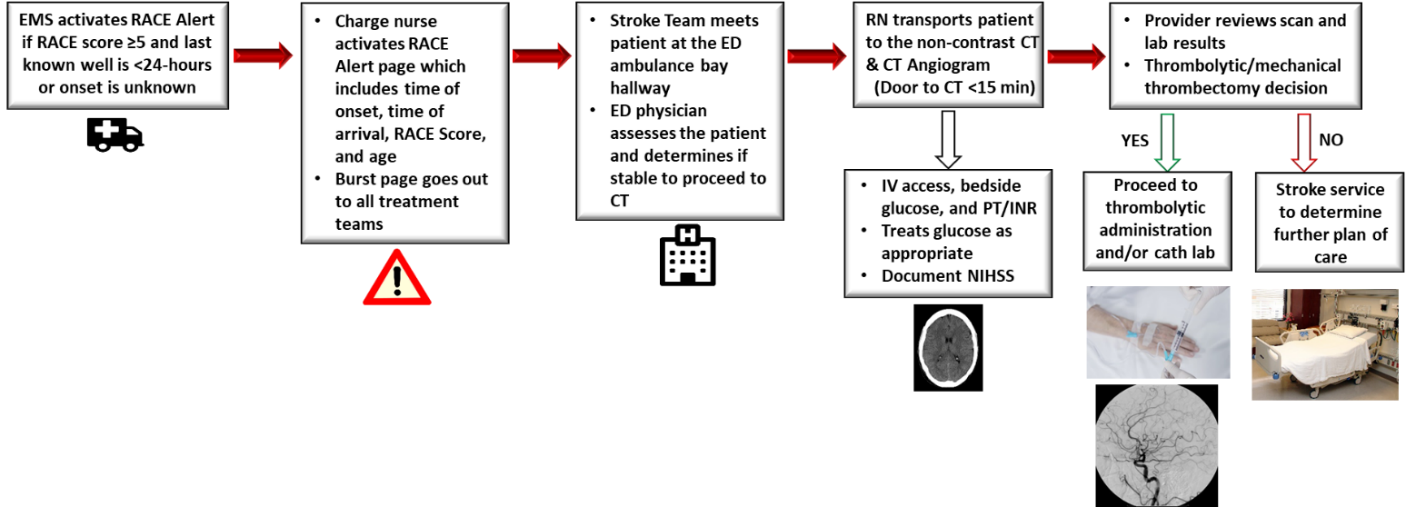
**
